# Supplementary material for: Hofmeister effect-driven superlattice construction via hydrophilic/hydrophobic transition of poly(ethylene glycol) ligands
Source: Royal Society of Chemistry journal article supplement (doi:10.1039/d3py01159c), 2023-12-13
Supplement: d3py01159c1.pdf [file d3py01159c1.pdf]

## Supporting Information

# Hofmeister Effect-Driven Superlattice Construction *via* Hydrophilic/Hydrophobic Transition of Poly(ethylene glycol) Ligands

Yanqiu Du,<sup>a</sup> Haidong Li,<sup>a</sup> Yang Jiang,<sup>a</sup> Yunchao Xiao,<sup>a</sup> Jipeng Guan,<sup>a</sup> Xuejie Liu,<sup>\*a</sup> and Nan

Yan<sup>\*b</sup>

<sup>a</sup> College of Materials and Textile Engineering, Jiaying University, Jiaying 314001, China

<sup>b</sup> Department of Chemistry, Changchun Normal University, Changchun 130032, China

\* Corresponding author: E-mail: [yannan@ccsfu.edu.cn](mailto:yannan@ccsfu.edu.cn); [00008109@zjxu.edu.cn](mailto:00008109@zjxu.edu.cn)

## Supplementary Figures

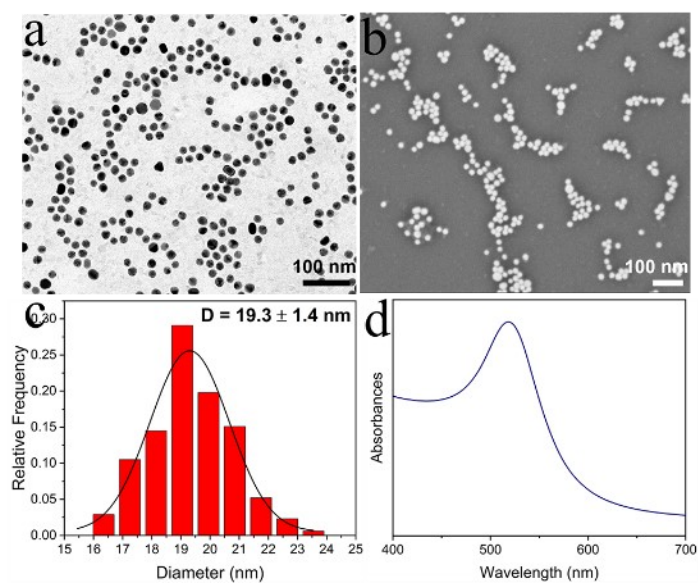

**Fig. S1** (a-b) TEM and SEM images of the monodispersed AuNPs<sub>19.3</sub>@PEG<sub>1k</sub> building blocks. (c) The size distribution histogram of corresponding AuNPs<sub>19.3</sub>@PEG<sub>1k</sub>. (d) UV-Vis spectra of the monodispersed AuNPs<sub>19.3</sub>@PEG<sub>1k</sub>.

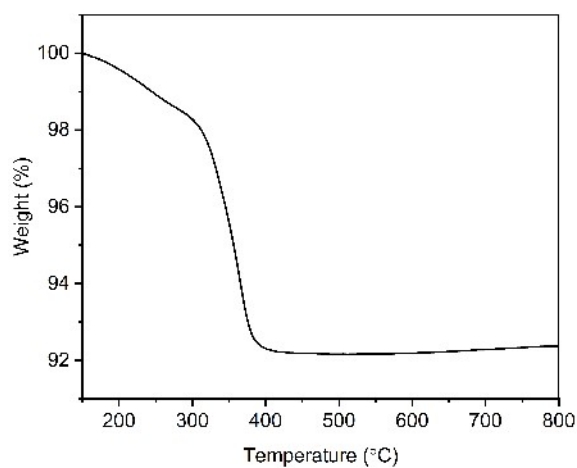

**Fig. S2** TGA analysis of the AuNPs<sub>19.3</sub>@PEG<sub>1k</sub> nanoparticles.

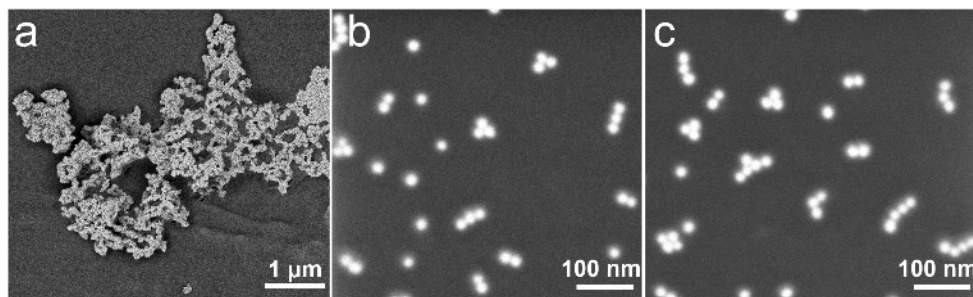

**Fig. S3** (a-b) SEM images of the AuNPs<sub>19,3</sub> in a 0.60 M K<sub>2</sub>CO<sub>3</sub> solution and deionized water, respectively; (c) SEM image of the AuNPs<sub>19,3</sub>@PEG<sub>1k</sub> in deionized water.

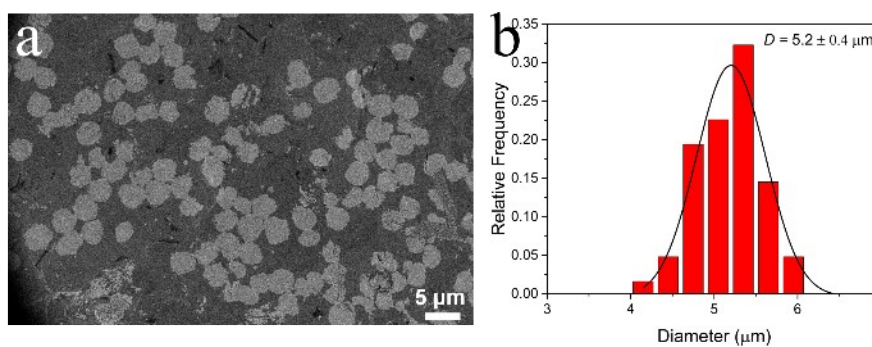

**Fig. S4** (a) SEM image of the 2D superlattice sheets at low magnification. (b) The size distribution histogram of corresponding monolayer superlattice sheets.

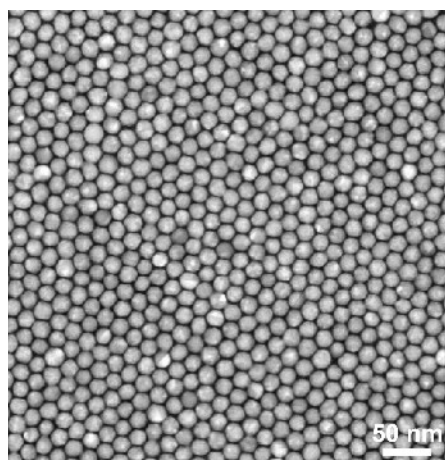

**Fig. S5** STEM image of the 2D monolayer superlattice sheets under low magnification.

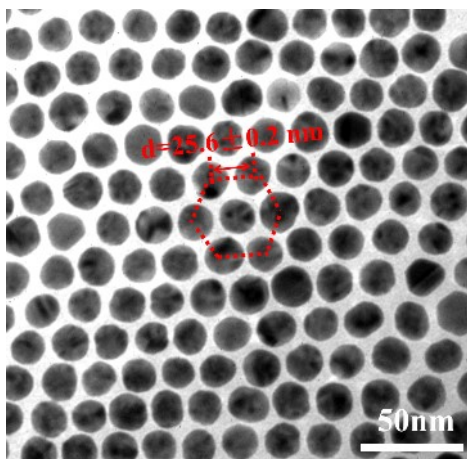

**Fig. S6** The interparticle centerpoint-to-centerpoint distances ( $d$ ) in the formed 2D monolayer superlattices are determined by TEM.

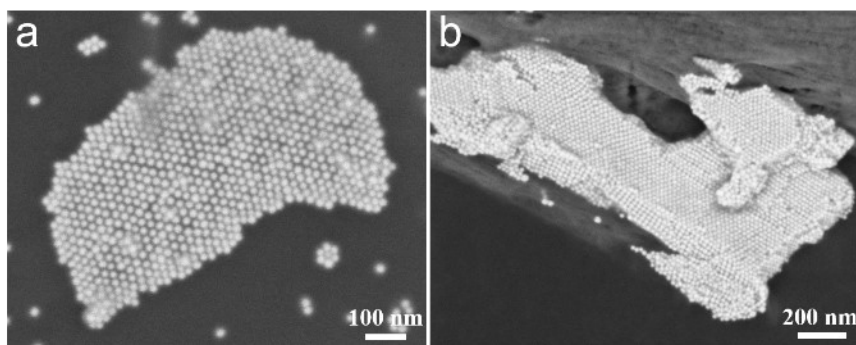

**Fig. S7** SEM images of 2D monolayer superlattices (a) and 3D superlattices self-assembled assembled from AuNPs<sub>19.3</sub>@PEG<sub>1k</sub> (b) building blocks in a 0.60 M and 0.69 M Na<sub>2</sub>CO<sub>3</sub> solution, respectively.

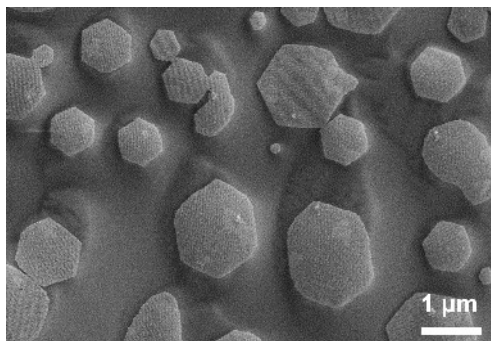

**Fig. S8** SEM image of hexagonal monolayer superlattices formed in a 0.69 M  $K_2CO_3$  solution for 12 h.

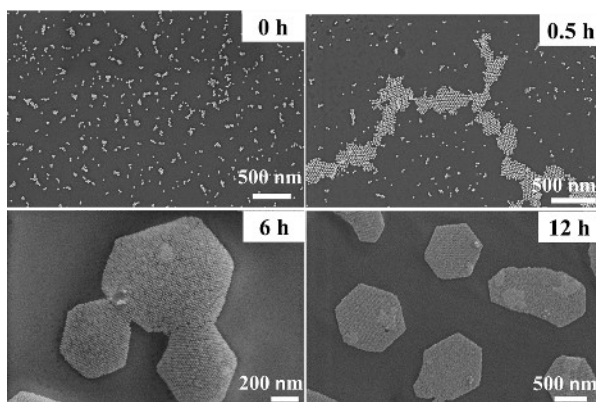

**Fig. S9** A sequence of SEM images showing the formation of hexagonal monolayer superlattices formed in a 0.69 M  $K_2CO_3$  solution.

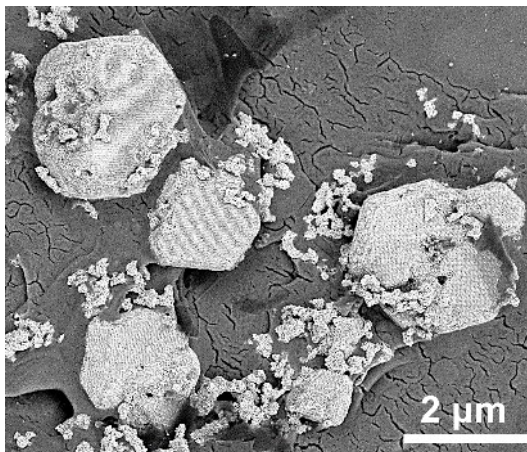

**Fig. S10** SEM image of 3D single crystals in a 0.69 M K<sub>2</sub>CO<sub>3</sub> solution.

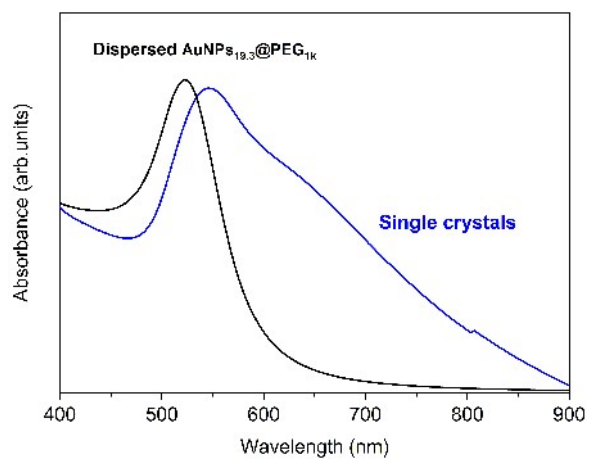

**Fig. S11** UV-Vis spectra of dispersed AuNPs<sub>19.3</sub>@PEG<sub>1k</sub> (black line) and single crystals self-assembled from AuNPs<sub>19.3</sub>@PEG<sub>1k</sub> building blocks (blue line).

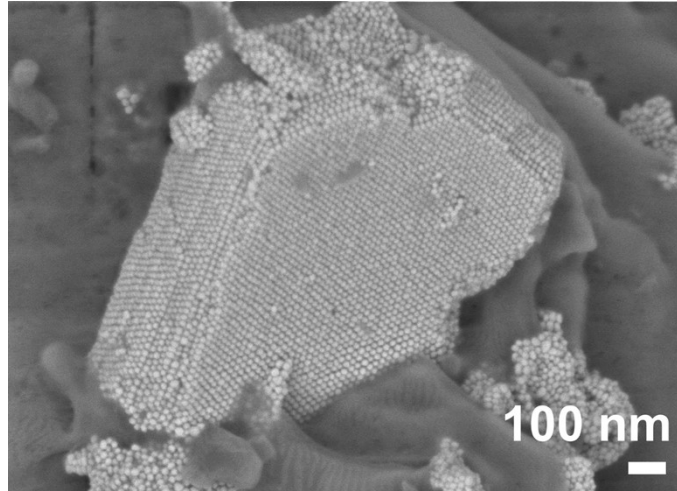

**Fig. S12** SEM image of the single crystal obtained in a 0.69 M  $\text{K}_2\text{CO}_3$  solution when the growth time is 6 h.

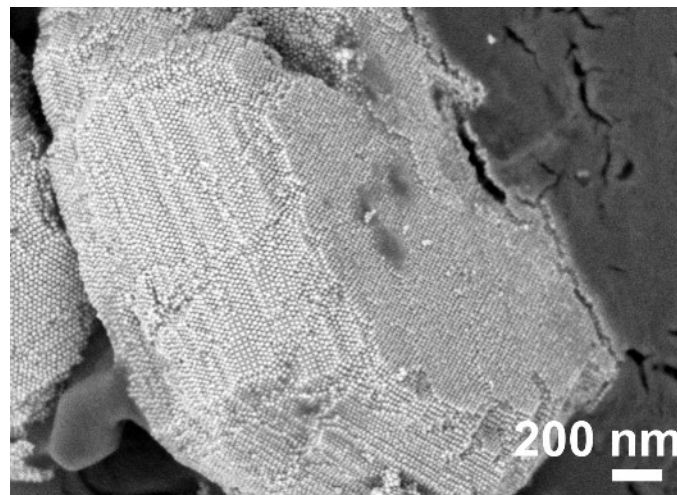

**Fig. S13** SEM image of the single crystal obtained in a 0.69 M  $\text{K}_2\text{CO}_3$  solution when the growth time is 13 h.

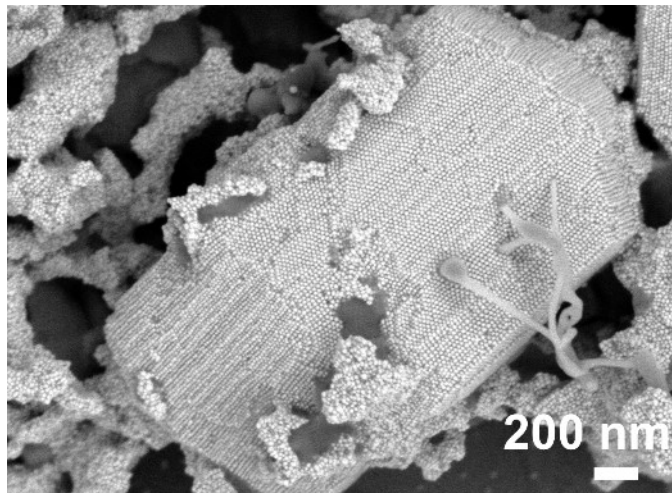

**Fig. S14** SEM image of the single crystal obtained in a 0.69 M  $K_2CO_3$  solution when the growth time is 24 h.

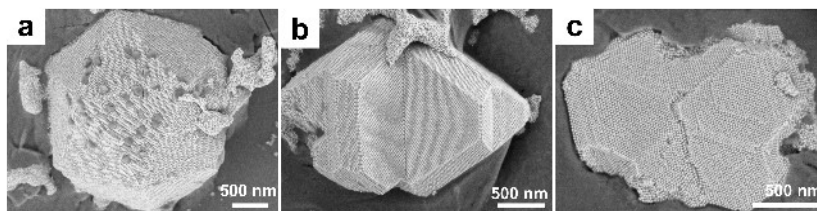

**Fig. S15** The formation of multiply twinned superlattices. SEM images of multiply twinned superlattices with quasi-icosahedron (a), a single twin plane (b) and several parallel twin planes (c) that are generated in a 0.85 M  $K_2CO_3$  solution.



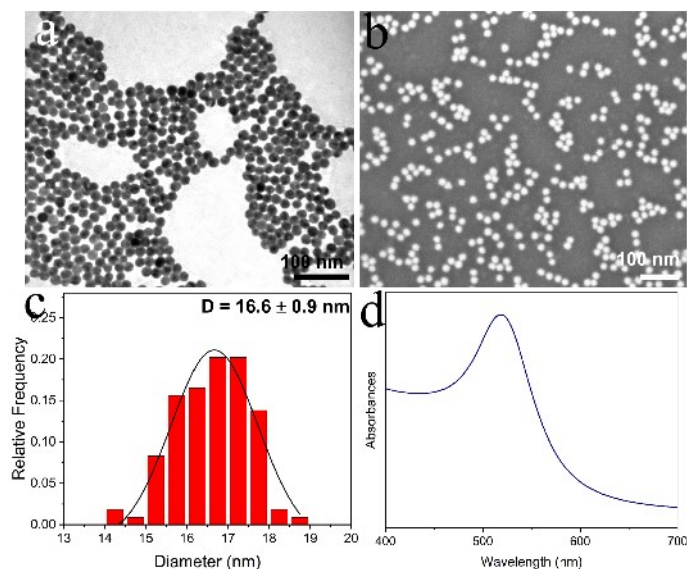

**Fig. S16** (a-b) TEM and SEM images of the monodispersed AuNPs with the diameter of 16.6 nm. (c) The size distribution histogram of corresponding AuNPs<sub>16.6</sub>. (d) UV-Vis spectra of the monodispersed AuNPs<sub>16.6</sub>.

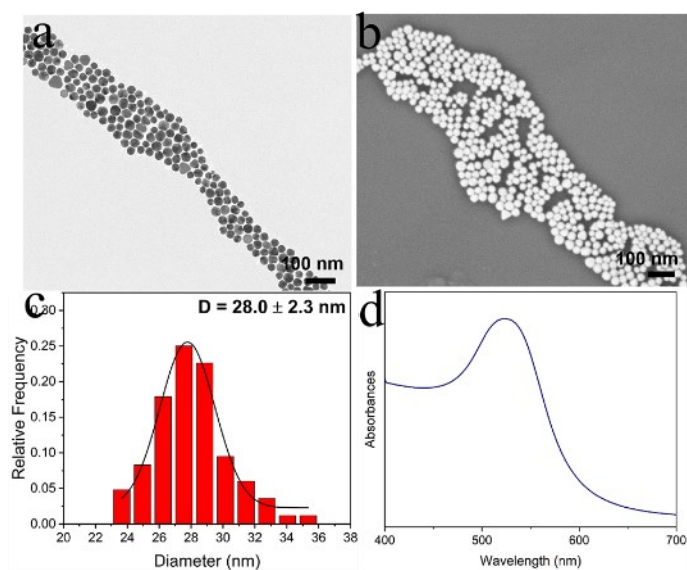

**Fig. S17** (a-b) TEM and SEM images of the monodispersed AuNPs with the diameter of 28.0 nm. (c) The size distribution histogram of corresponding AuNPs<sub>28.0</sub>. (d) UV-Vis spectra of the monodispersed AuNPs<sub>28.0</sub>.

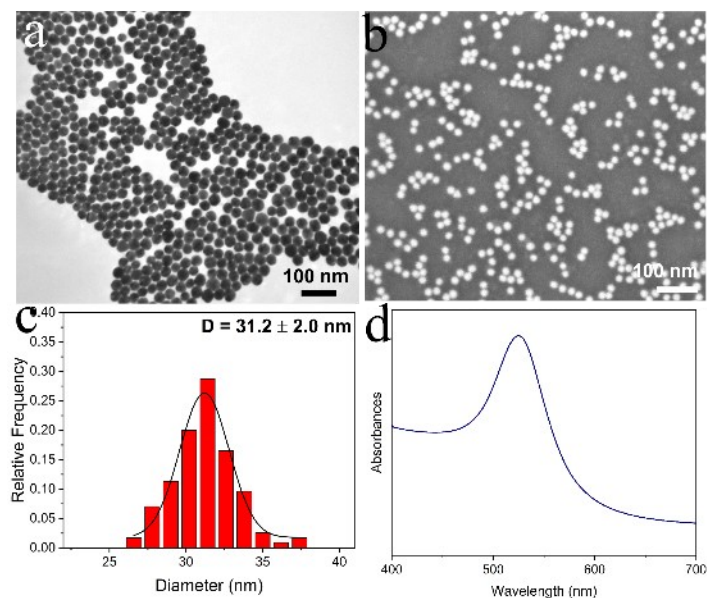

**Fig. S18** (a-b) TEM and SEM images of the monodispersed AuNPs with the diameter of 31.2 nm. (c) The size distribution histogram of corresponding AuNPs<sub>31.2</sub>. (d) UV-Vis spectra of the monodispersed AuNPs<sub>31.2</sub>.

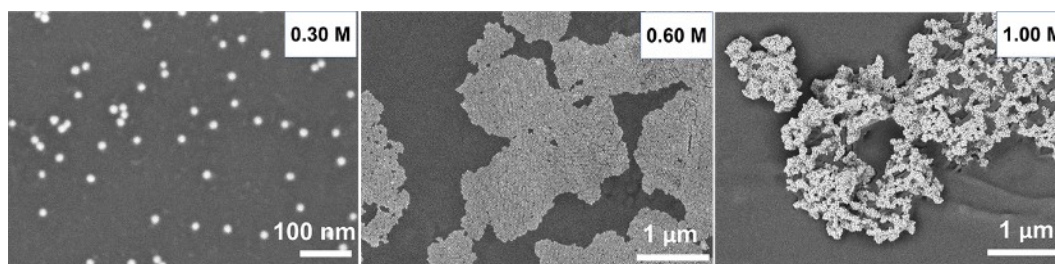

**Fig. S19** SEM images of the assembly behavior of AuNPs<sub>16.6</sub>@PEG<sub>2k</sub> at  $\lambda$  of 0.96 in different K<sub>2</sub>CO<sub>3</sub> concentration solution, from left to right are dispersed nanoparticles, monolayer superlattices and disordered aggregates.

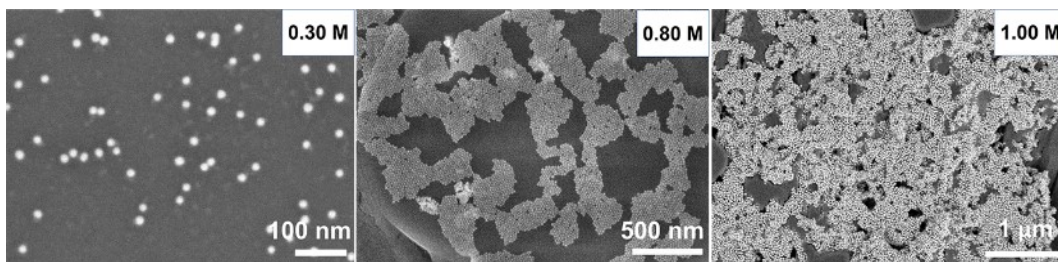

**Fig. S20** SEM images of the assembly behavior of AuNPs<sub>16.6</sub>@PEG<sub>5k</sub> at  $\lambda$  of 1.55 in different  $K_2CO_3$  concentration solution, from left to right are dispersed nanoparticles, monolayer superlattices and disordered aggregates.

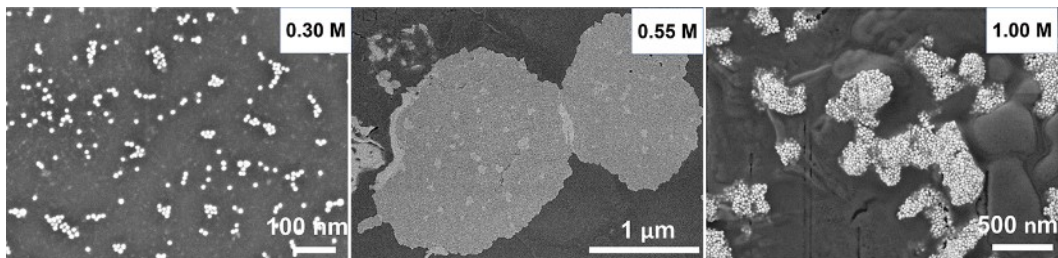

**Fig. S21** SEM images of the assembly behavior of AuNPs<sub>19.3</sub>@PEG<sub>2k</sub> at  $\lambda$  of 0.83 in different  $K_2CO_3$  concentration solution, from left to right are dispersed nanoparticles, monolayer superlattices and disordered aggregates.

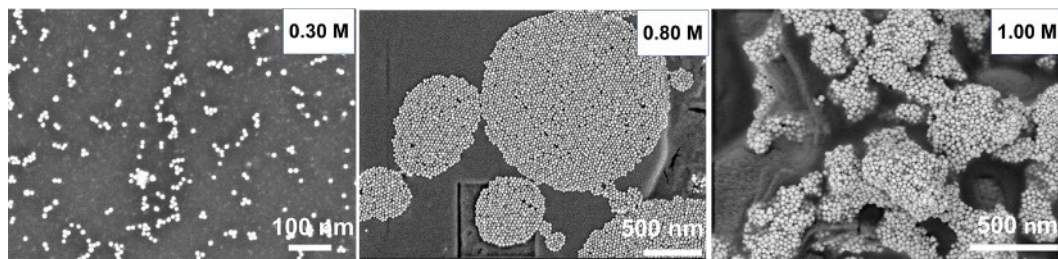

**Fig. S22** SEM images of the assembly behavior of AuNPs<sub>19.3</sub>@PEG<sub>5k</sub> at  $\lambda$  of 1.35 in different  $K_2CO_3$  concentration solution, from left to right are dispersed nanoparticles, monolayer

superlattices and disordered aggregates.

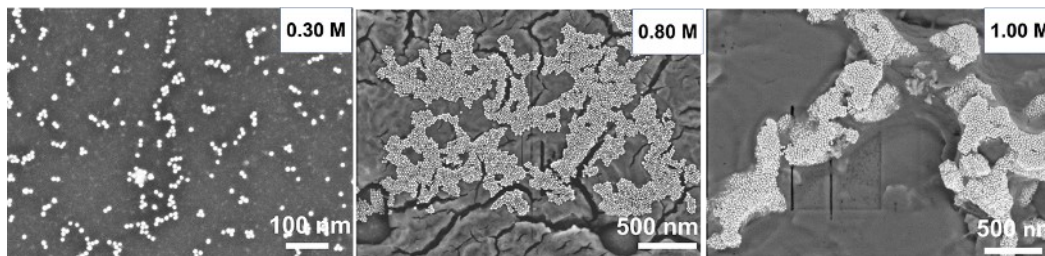

**Fig. S23** SEM images of the assembly behavior of AuNPs<sub>28.0</sub>@PEG<sub>5k</sub> at  $\lambda$  of 0.93 in different K<sub>2</sub>CO<sub>3</sub> concentration solution, from left to right are dispersed nanoparticles, monolayer superlattices and disordered aggregates.

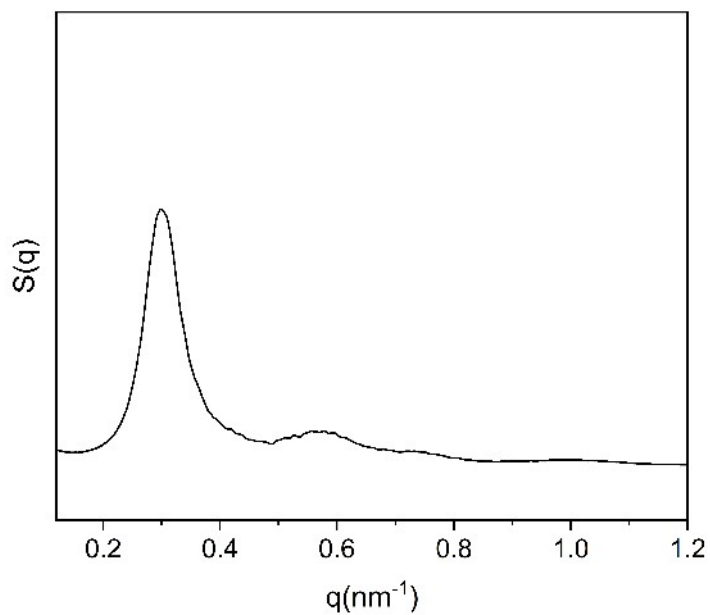

**Fig. S24** SAXS pattern of the disordered aggregates assembled from AuNPs<sub>16.6</sub>@PEG<sub>1k</sub> building blocks in 1.00 M K<sub>2</sub>CO<sub>3</sub> solution.
